# Supplementary material for: Bifunctional catalysts of Ni nanoparticle coupled MoO2nanorods for overall water splitting
Source: Royal Society of Chemistry journal article supplement (doi:10.1039/d2dt00022a), 2022-01-01
Supplement: d2dt00022a1.pdf [file d2dt00022a1.pdf]

## Electronic Supplementary Information

### **Bifunctional catalysts of Ni nanoparticles coupled MoO<sub>2</sub> nanorods for overall water splitting**

*Zhiqiang Yao<sup>1,2</sup>, Chenfeng Wang<sup>1,2</sup>, Zengyao Wang<sup>1,2</sup>, Guanglei Liu<sup>1,3</sup>, Crystal Bowers<sup>4</sup>, Pei Dong<sup>4</sup>, Mingxin Ye<sup>1\*</sup>, Jianfeng Shen<sup>1\*</sup>*

<sup>1</sup>Institute of Special Materials and Technology, Fudan University, Shanghai 200433, China

<sup>2</sup>Department of Chemistry, Fudan University, Shanghai, 200433, P. R. China

<sup>3</sup>Department of Materials Science, Fudan University, Shanghai, 200433, P. R. China

<sup>4</sup>Department of Mechanical Engineering, George Mason University, VA 22030, USA

\*Correspondence to: [mxye@fudan.edu.cn](mailto:mxye@fudan.edu.cn), [jfshen@fudan.edu.cn](mailto:jfshen@fudan.edu.cn)

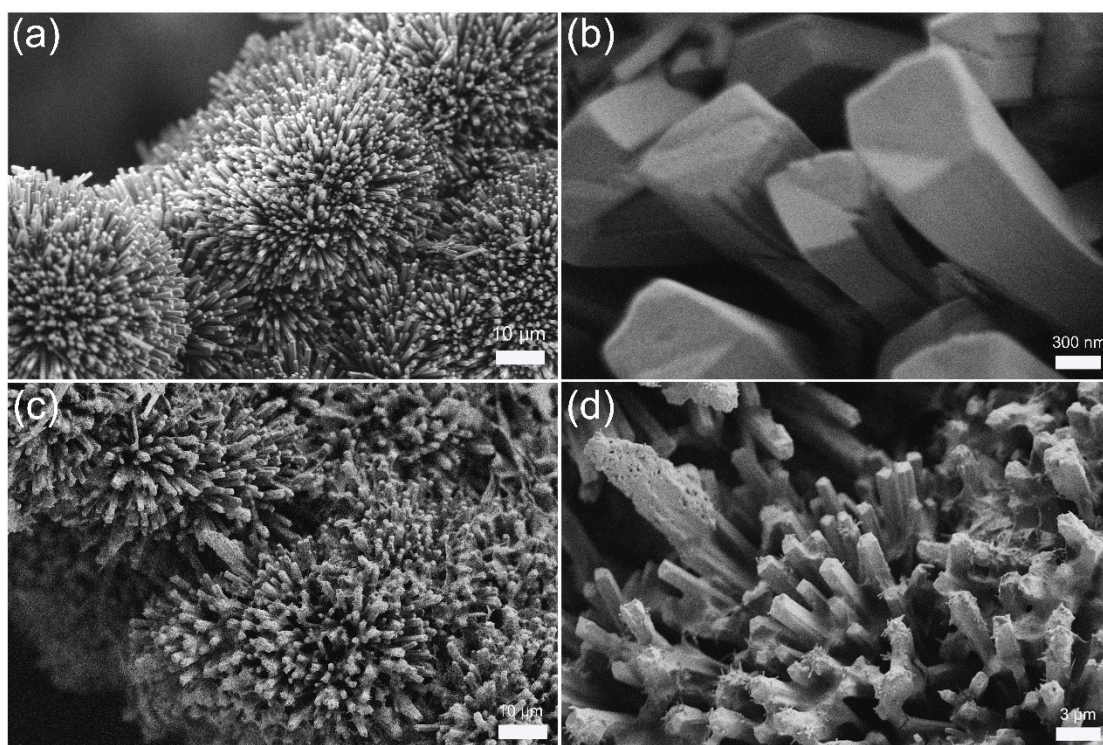

Fig. S1. SEM images of (a, b) NiMoO<sub>4</sub>·xH<sub>2</sub>O and (c, d) NMO-ZIF.

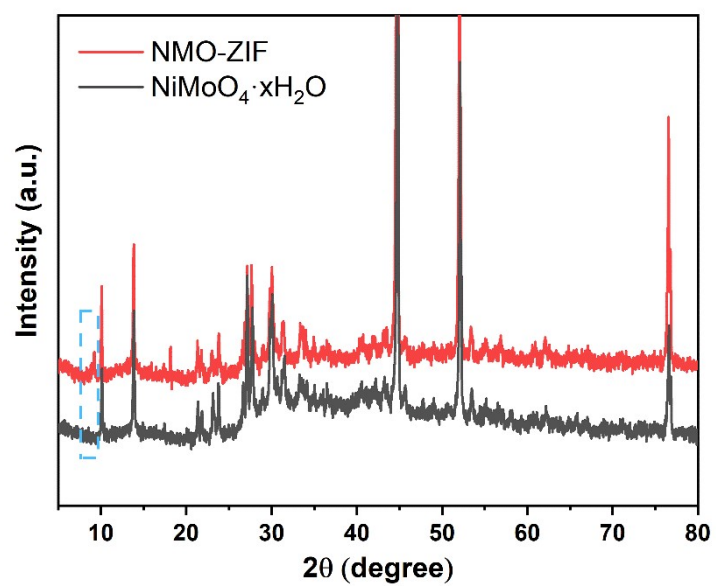

Fig. S2. XRD images of NiMoO<sub>4</sub>·xH<sub>2</sub>O and NMO-ZIF.

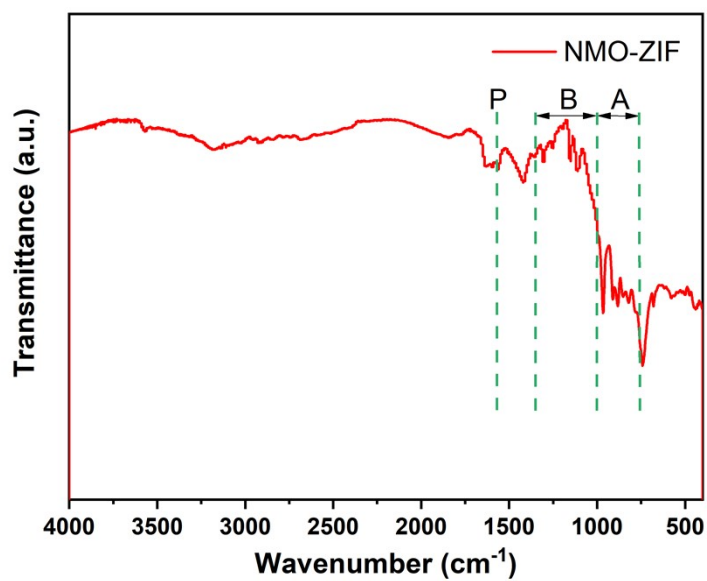

Fig. S3. FTIR spectrum of NMO-ZIF.

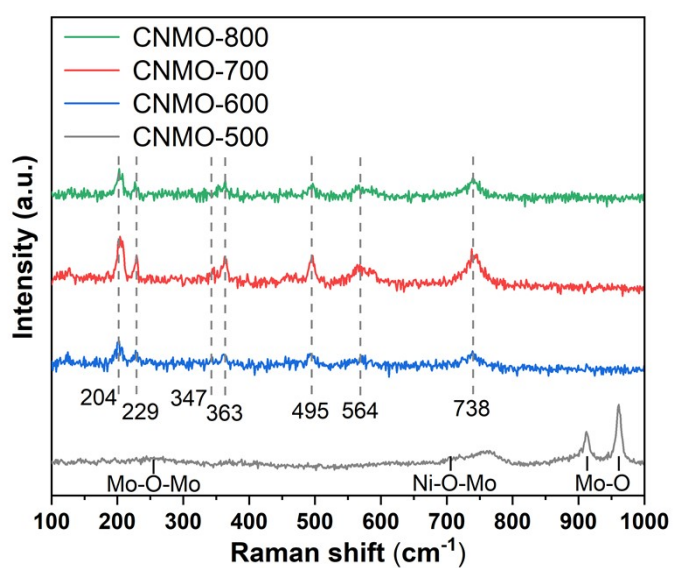

Fig. S4. Raman spectra of CNMOs at different calcination temperatures.

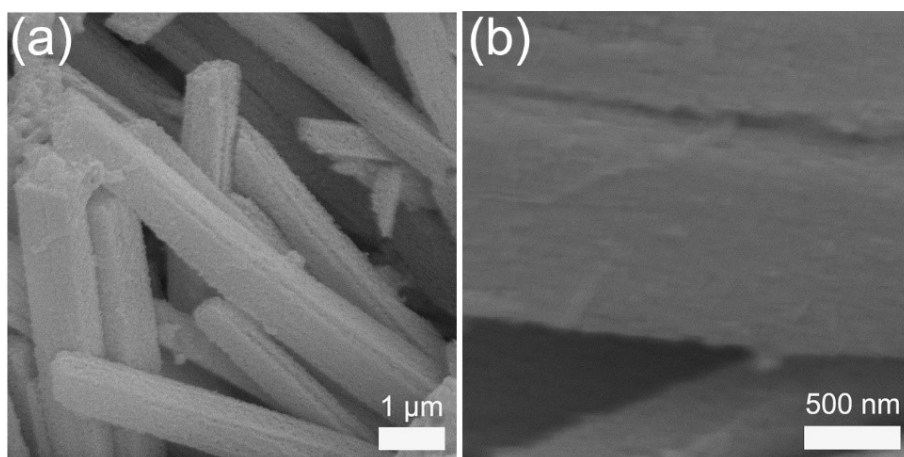

Fig. S5. SEM images of CNMO-700 after acid etching.

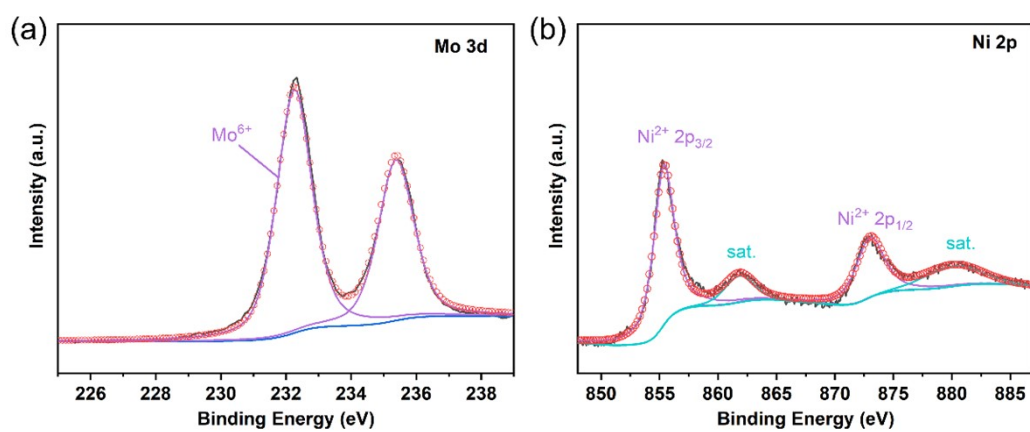

Fig. S6. XPS spectra of CNMO-500. (a) Mo 3d, (b) Ni 2p.

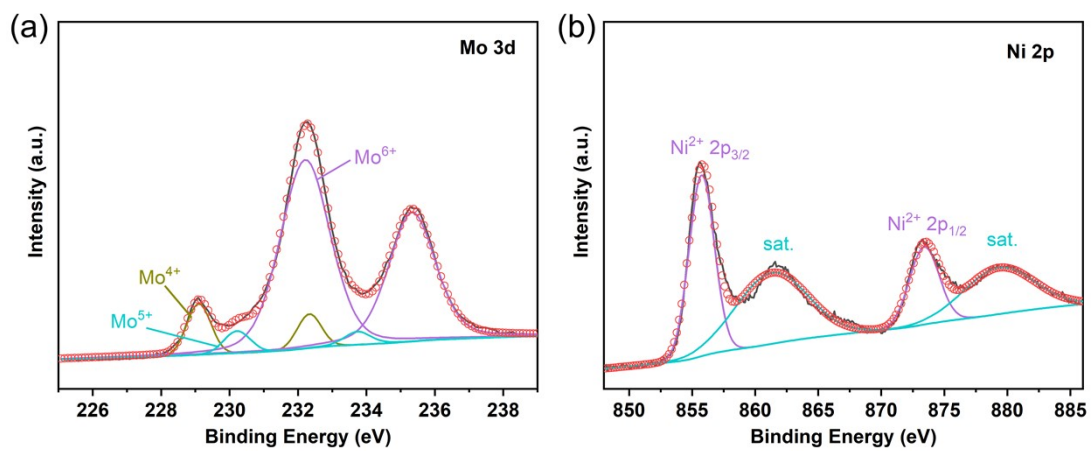

Fig. S7. XPS spectra of MoO<sub>2</sub>. (a) Mo 3d, (b) Ni 2p.

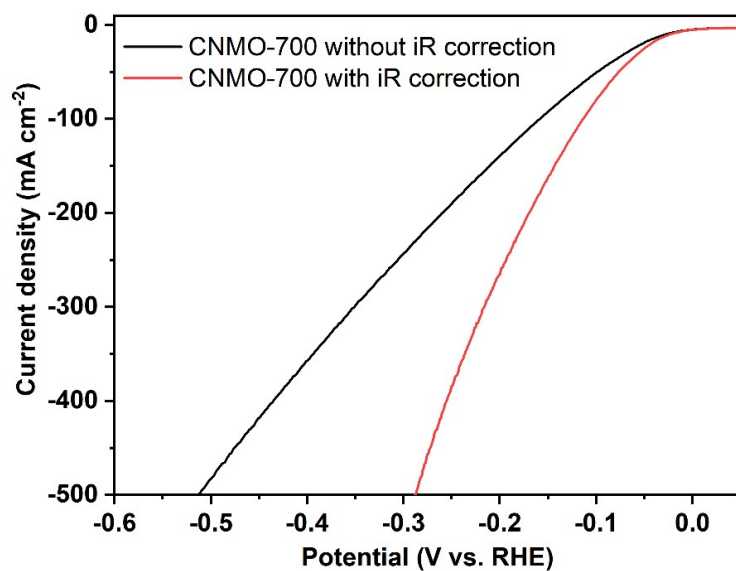

Fig. S8. LSV curves of CNMO-700 with/without iR correction for HER.

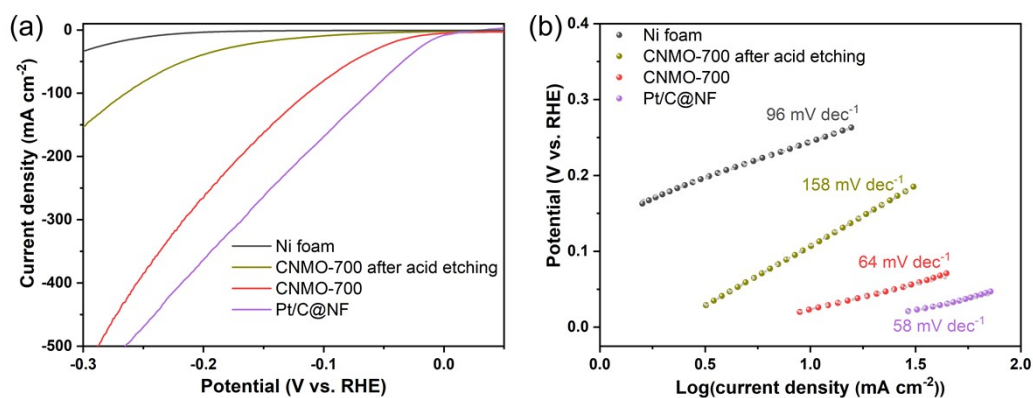

Fig. S9. (a) LSV curves and (b) Tafel slopes of Ni foam, CNMO-700 after acid etching, Pt/C and CNMO-700 for HER.

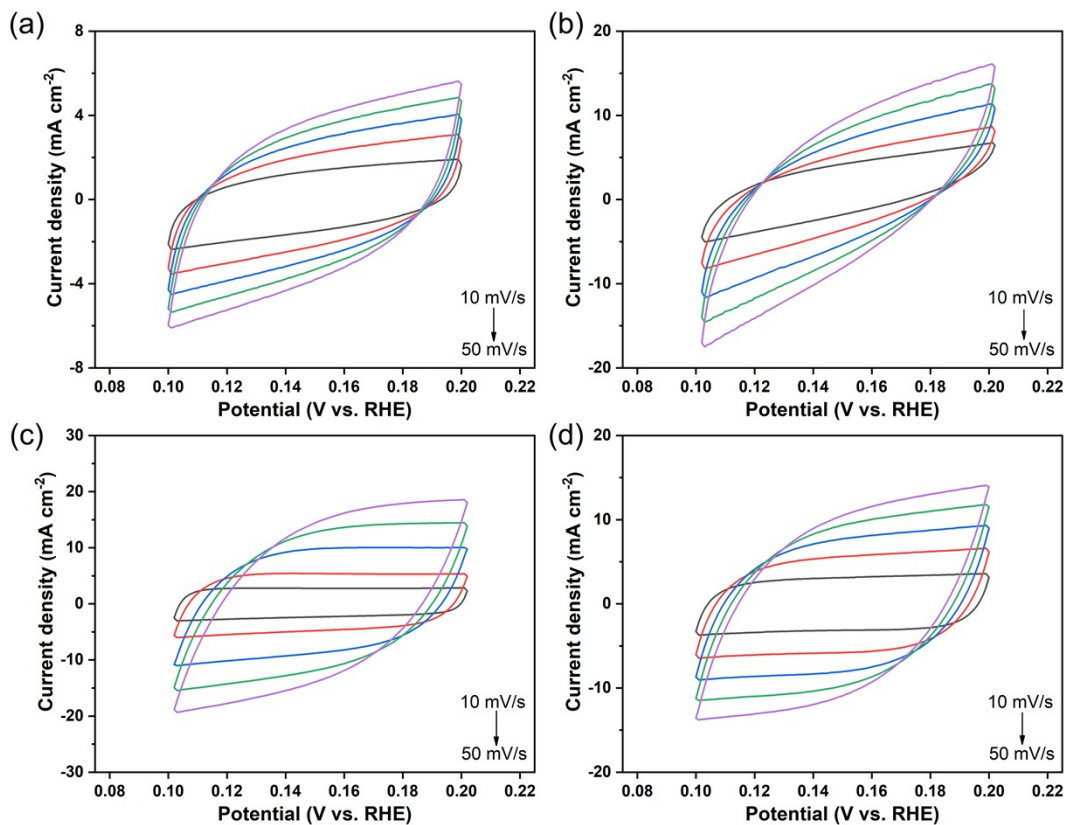

Fig. S10. Typical cyclic voltammograms of CNMO-500, 600, 700, 800 at scan rates ranging from 10 to 50 mV s<sup>-1</sup>, the scanning potential range is from 0.10 V to 0.20 V.

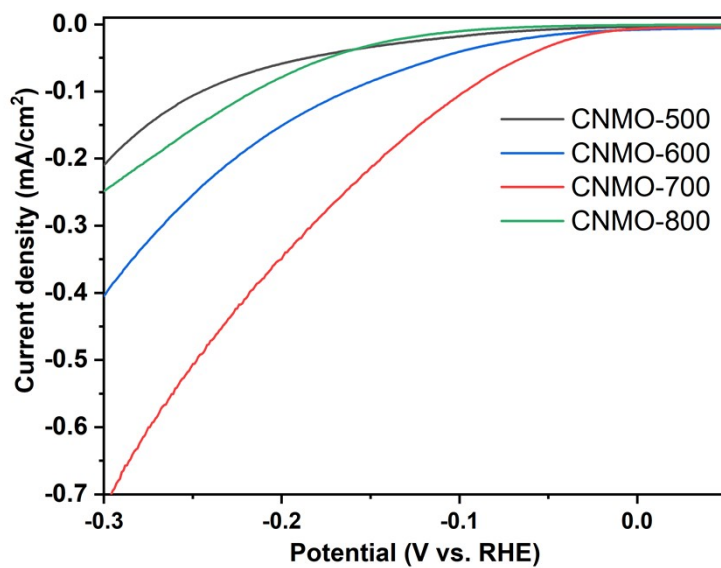

Fig. S11. HER activity (current density) of the samples normalized by their ECSAs.

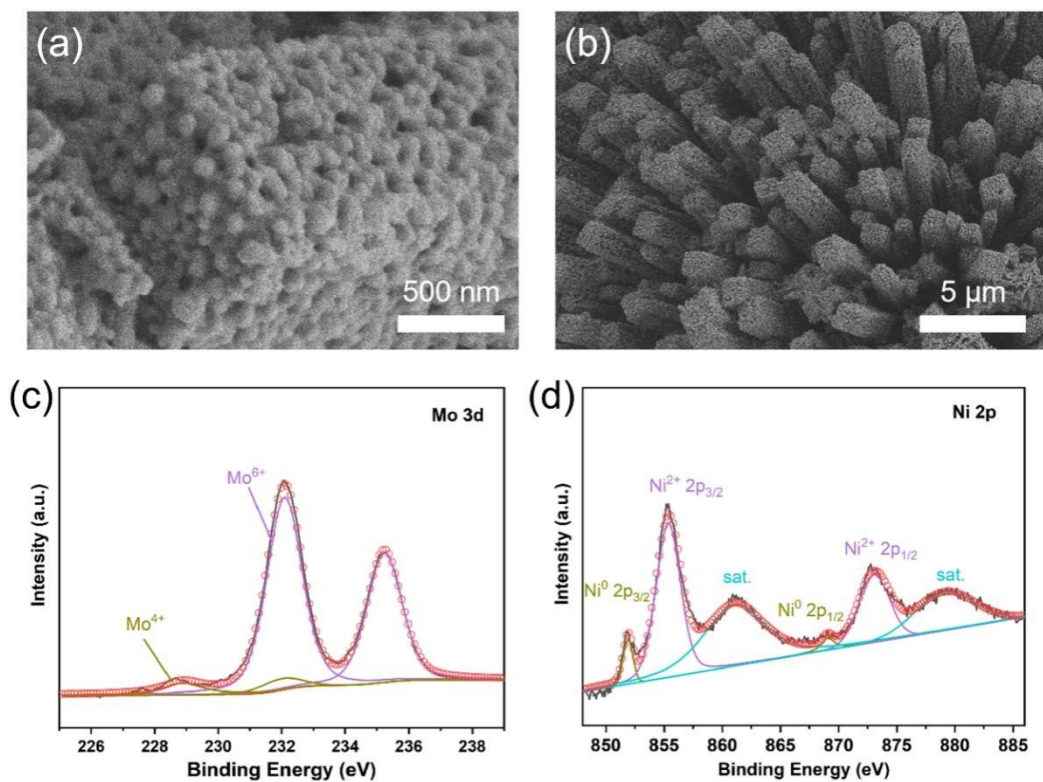

Fig. S12. (a, b) SEM images and (c, d) XPS spectra of CNMO-700 after hydrogen evolution stability test.

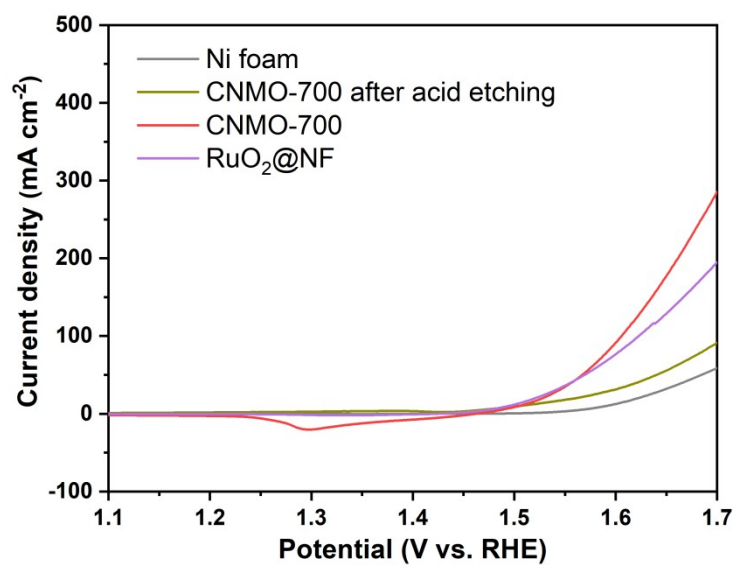

Fig. S13. LSV of Ni foam, CNMO-700 after acid etching, CNMO-700, RuO<sub>2</sub> for OER.

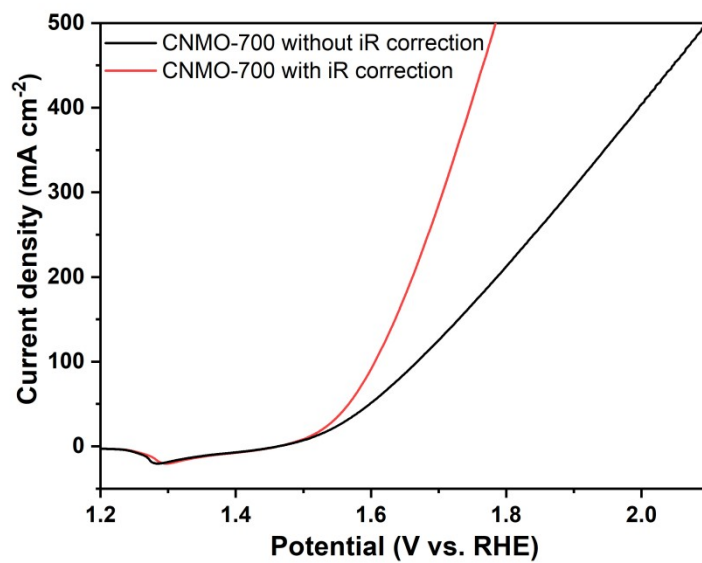

Fig. S14. LSV curves of CNMO-700 with and without iR correction for OER.



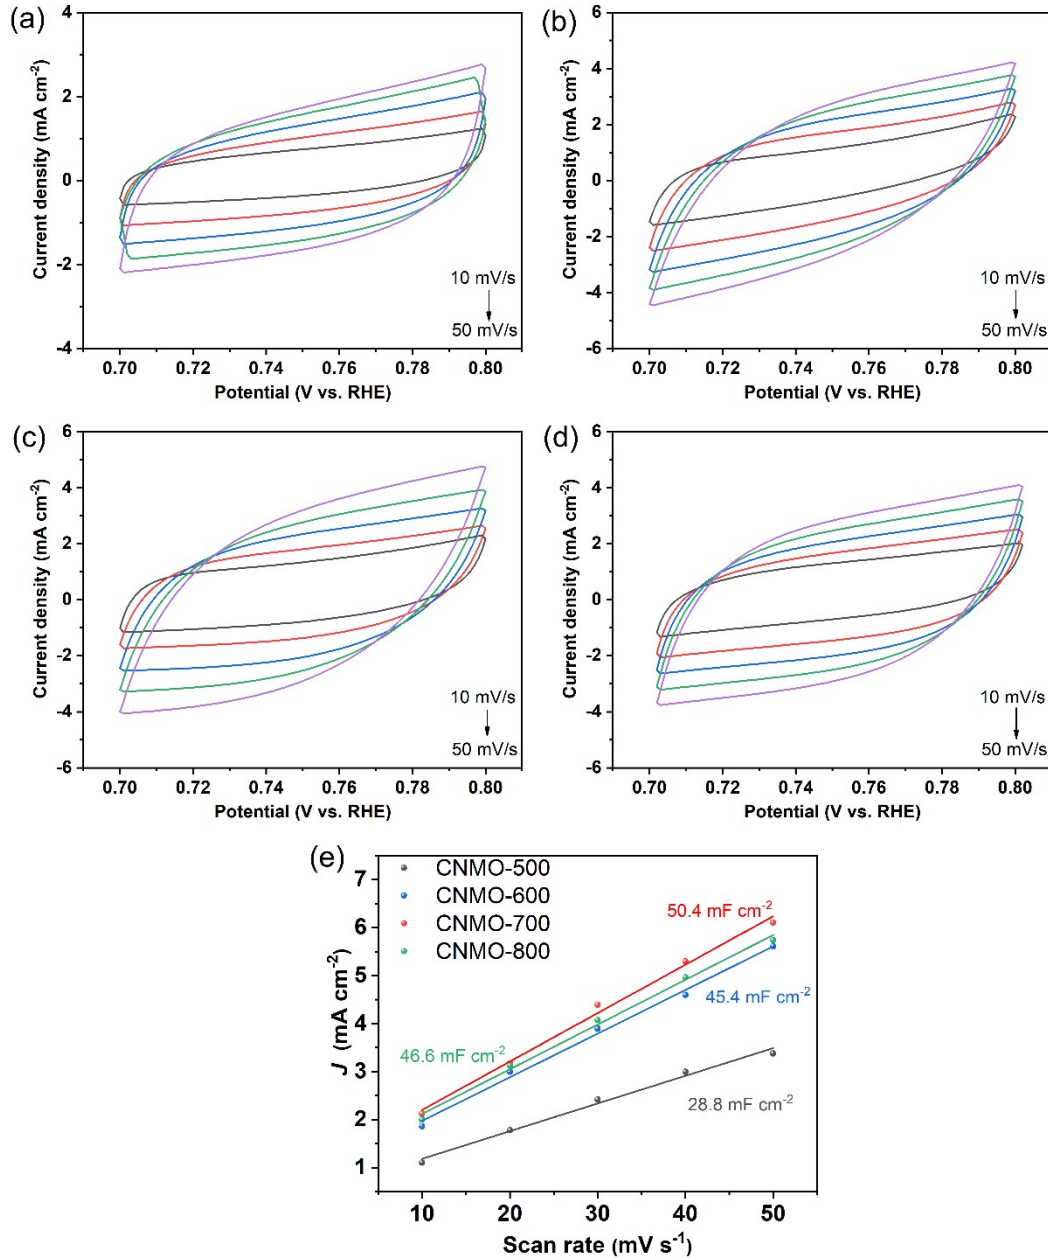

Fig. S15. (a-d) Typical cyclic voltammograms (CV) of CNMO-500, 600, 700, 800 at scan rates ranging from 10 to 50 mV s<sup>-1</sup>, the scanning potential range is from 0.7 V to 0.8 V. (e) ECSA estimated by  $C_{dl}$  values.

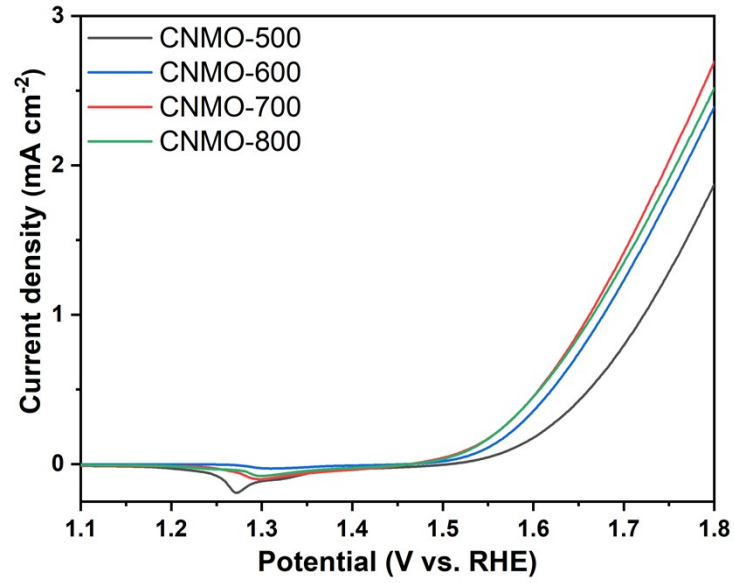

Fig. S16. OER activity (current density) of the samples normalized by their ECSAs.

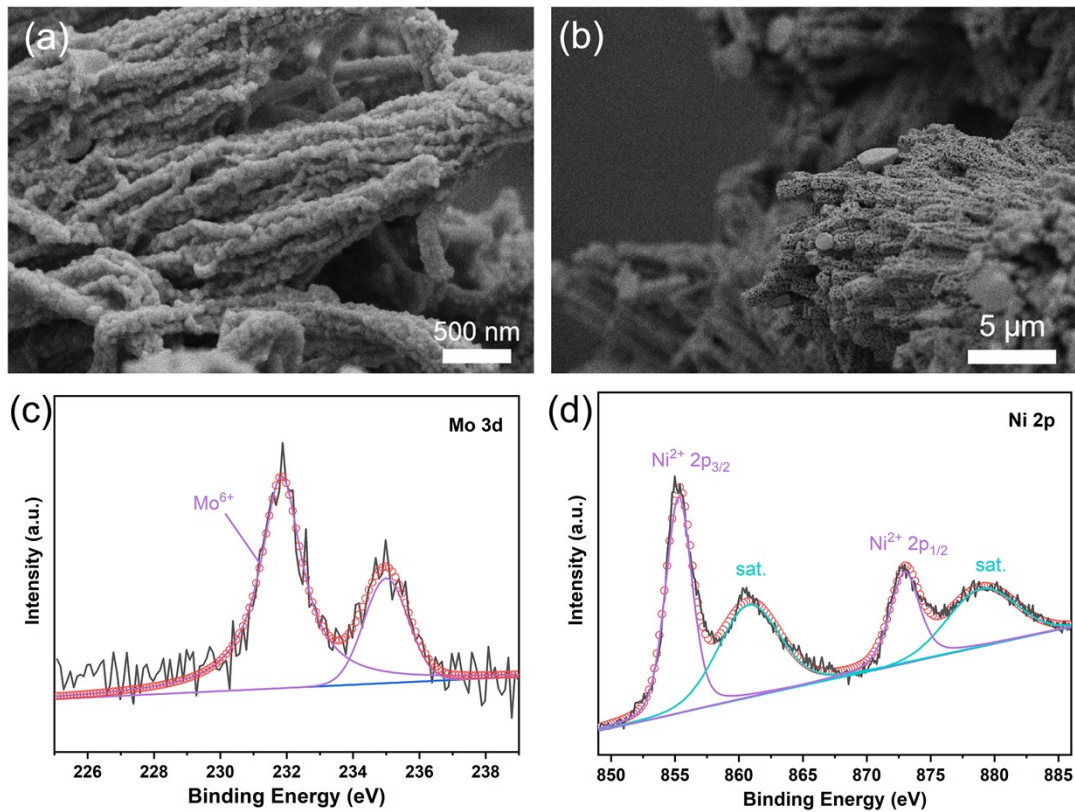

Fig. S17. (a, b) SEM images and (c, d) XPS spectra of CNMO-700 after OER stability test.

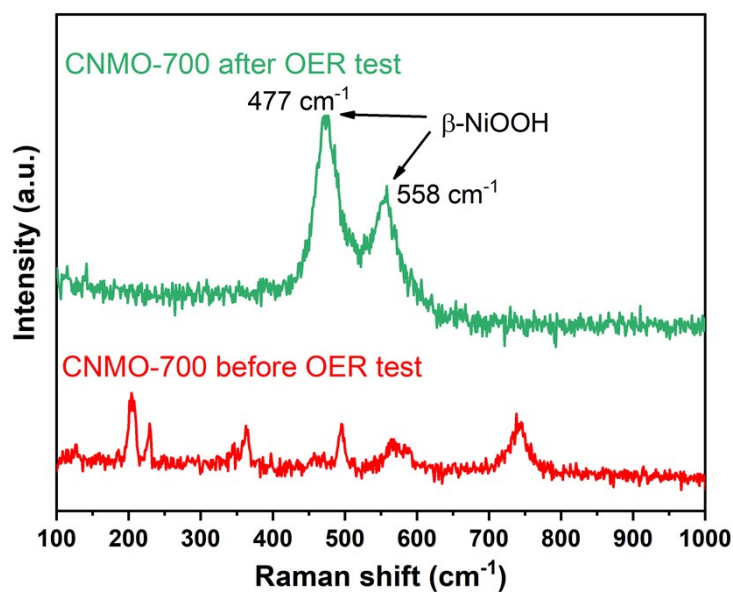

Fig. S18. Raman spectrum of the CNMO-700 before and after OER test.

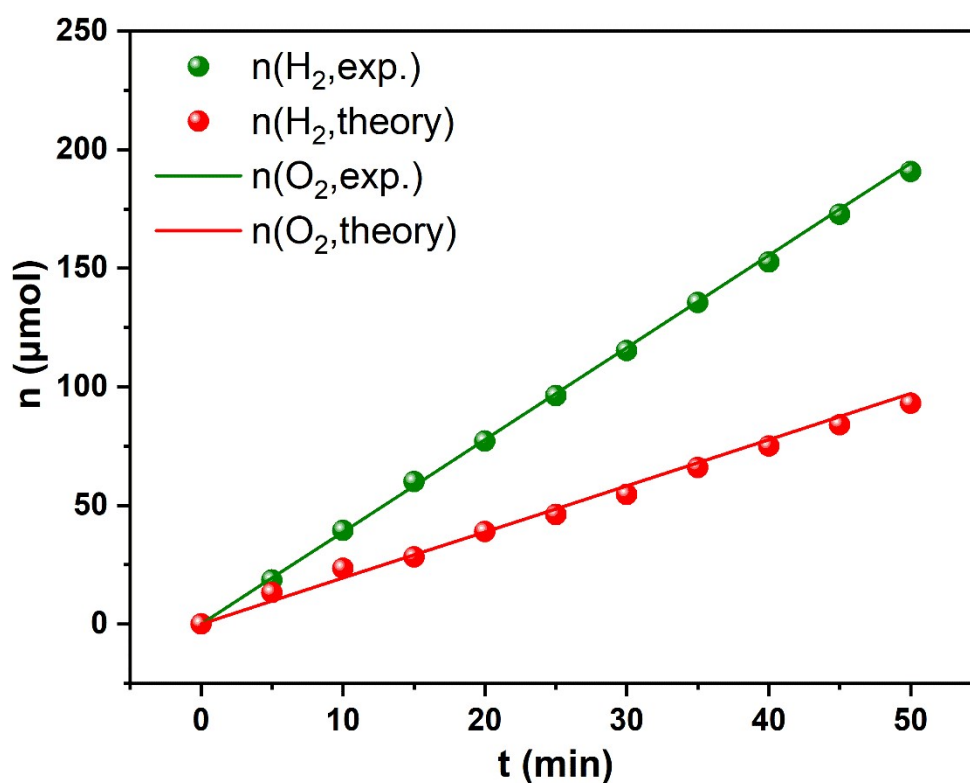

Fig. S19. The amount of gas theoretically calculated and experimentally measured versus time for overall water splitting at the current density of  $50 \text{ mA cm}^{-2}$ .

Table S1. Comparison of HER, OER and overall water splitting activity of Ni-MoO<sub>2</sub> with other TMO-based bifunctional electrocatalysts in 1 M KOH.

| Materials                                                              | HER         |                         | OER         |                         | Overall  | Ref.      |
|------------------------------------------------------------------------|-------------|-------------------------|-------------|-------------------------|----------|-----------|
|                                                                        | $\eta_{10}$ | Tafel slope             | $\eta_{10}$ | Tafel slope             | $E_{10}$ |           |
|                                                                        | (mV)        | (mV dec <sup>-1</sup> ) | (mV)        | (mV dec <sup>-1</sup> ) | (V)      |           |
| Ni-MoO <sub>2</sub>                                                    | 24          | 64                      | 275         | 81                      | 1.55     | This work |
| NiO-Ni <sub>3</sub> S <sub>2</sub>                                     | 71          | 70                      | 290         | 75                      | 1.57     | [1]       |
| CF@Ni@NiO                                                              | 153         | 84                      | 300         | 60                      | 1.65     | [2]       |
| NiFeP-MoO <sub>2</sub>                                                 | 56          | 81                      | 149         | 29                      | 1.41     | [3]       |
| Ni <sub>2</sub> P/MoO <sub>2</sub> @MoS <sub>2</sub>                   | 159         | 77                      | 280         | 85                      | 1.72     | [4]       |
| N-NiMoO <sub>4</sub> /NiS <sub>2</sub>                                 | 99          | 74                      | 283         | 44                      | 1.60     | [5]       |
| NiMoO <sub>4-x</sub> /MoO <sub>2</sub>                                 | 41          | 31                      | 233         | 69                      | 1.56     | [6]       |
| NiCo <sub>2</sub> O <sub>4</sub>                                       | 110         | 50                      | ~280        | 53                      | 1.65     | [7]       |
| Co-Fe NPs                                                              | 220         | 73                      | 340         | 51                      | 1.92     | [8]       |
| Ni <sub>x</sub> Co <sub>1-x</sub> MoO <sub>4</sub> @CoMoO <sub>4</sub> | 61          | 63                      | 180         | 43                      | 1.46     | [9]       |
| P-Co <sub>3</sub> O <sub>4</sub>                                       | 120         | 52                      | 280         | 51.6                    | 1.69     | [10]      |
| ceria/Ni-TMO                                                           | 93          | 69                      | 220         | 38                      | 1.58     | [11]      |
| Co@Co <sub>3</sub> O <sub>4</sub> /FeNS-RGO                            | 130         | 108                     | 287         | 69                      | 1.65     | [12]      |
| NF/H-CoMoO <sub>4</sub>                                                | 42          | 91                      | 295         | /                       | 1.56     | [13]      |
| CoNiMo-O                                                               | 60          | 73                      | 280         | 65                      | 1.59     | [14]      |

---

## References.

1. L. Peng, J. Shen, X. Zheng, R. Xiang, M. Deng, Z. Mao, Z. Feng, L. Zhang, L. Li and Z. Wei, *Journal of Catalysis*, 2019, **369**, 345-351.
2. Z. Zhang, S. Liu, F. Xiao and S. Wang, *ACS Sustainable Chemistry & Engineering*, 2016, **5**, 529-536.
3. X. F. Wu, J. W. Li, Y. Li and Z. H. Wen, *Chemical Engineering Journal*, 2021, **409**.
4. Y. Wang, T. Williams, T. Gengenbach, B. Kong, D. Y. Zhao, H. T. Wang and C. Selomulya, *Nanoscale*, 2017, **9**, 17349-17356.
5. J. G. Li, K. Xie, H. Sun, Z. Li, X. Ao, Z. Chen, K. K. Ostrikov, C. Wang and W. Zhang, *ACS Appl Mater Interfaces*, 2019, **11**, 36649-36657.
6. Z. Zhang, X. Ma and J. Tang, *Journal of Materials Chemistry A*, 2018, **6**, 12361-12369.
7. X. Gao, H. Zhang, Q. Li, X. Yu, Z. Hong, X. Zhang, C. Liang and Z. Lin, *Angew Chem Int Ed Engl*, 2016, **55**, 6290-6294.
8. W. Adamson, X. Bo, Y. Li, B. H. R. Suryanto, X. Chen and C. Zhao, *Catalysis Today*, 2020, **351**, 44-49.
9. Z. K. Li, M. Y. Zheng, X. Zhao, J. Yang and W. L. Fan, *Nanoscale*, 2019, **11**, 22820-22831.
10. Z. Xiao, Y. Wang, Y.-C. Huang, Z. Wei, C.-L. Dong, J. Ma, S. Shen, Y. Li and S. Wang, *Energy & Environmental Science*, 2017, **10**, 2563-2569.
11. X. Long, H. Lin, D. Zhou, Y. An and S. Yang, *ACS Energy Letters*, 2018, **3**, 290-296.
12. J. Zhu, W. Tu, Z. Bai, H. Pan, P. Ji, H. Zhang, Z. Deng and H. Zhang, *Electrochimica Acta*, 2019, **323**.
13. K. Chi, X. Tian, Q. Wang, Z. Zhang, X. Zhang, Y. Zhang, F. Jing, Q. Lv, W. Yao, F. Xiao and S. Wang, *Journal of Catalysis*, 2020, **381**, 44-52.
14. B. Ren, D. Li, Q. Jin, H. Cui and C. Wang, *ChemElectroChem*, 2019, **6**, 413-420.
